# Supplementary material for: Synthesis, photochemical isomerization and photophysical properties of hydrazide–hydrazone derivatives
Source: Royal Society of Chemistry journal article supplement (doi:10.1039/d0nj05172a), 2020-12-14
Supplement: d0nj05172a1.pdf [file d0nj05172a1.pdf]

# **Synthesis, Photochemical Isomerization and Photophysical Properties of Hydrazide-Hydrazone Derivatives**

Bao-Xing Wu, Hsin-Yueh Chang, Yi-Shun Liao and Mei-Yu Yeh\*

Department of Chemistry, Chung Yuan Christian University, Republic of China, Taiwan

| <b>Contents</b>      | <b>Page Number</b> |
|----------------------|--------------------|
| 1. Experimental data | 02                 |
| 2. Calculation data  | 05                 |
| 3. NMR spectra       | 06                 |
| 4. HRMS spectra      | 09                 |

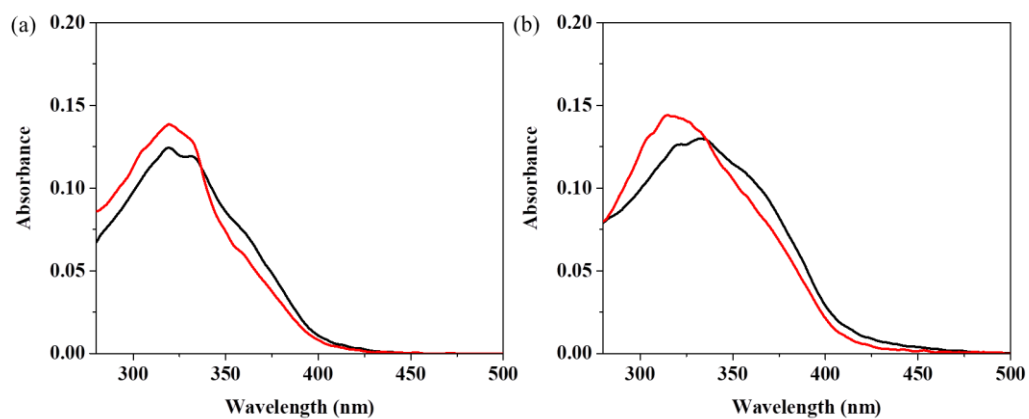

**Fig. S1** UV-Vis absorption spectra of (a) **3b** and (b) **3c** before irradiation (black) and after irradiation (red) with 365 nm light (Molecule concentration: 50  $\mu$ M).

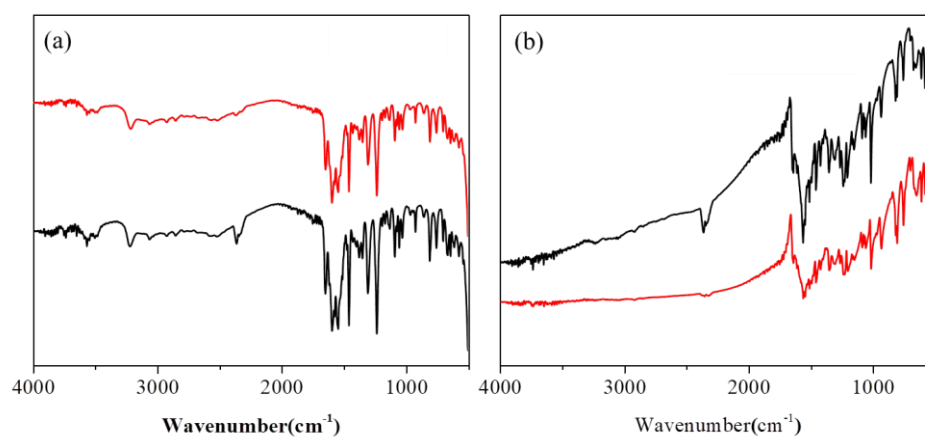

**Fig. S2** FT-IR spectra of (a) **3b** and (b) **3c** before irradiation (black) and after irradiation (red) with 365 nm light.

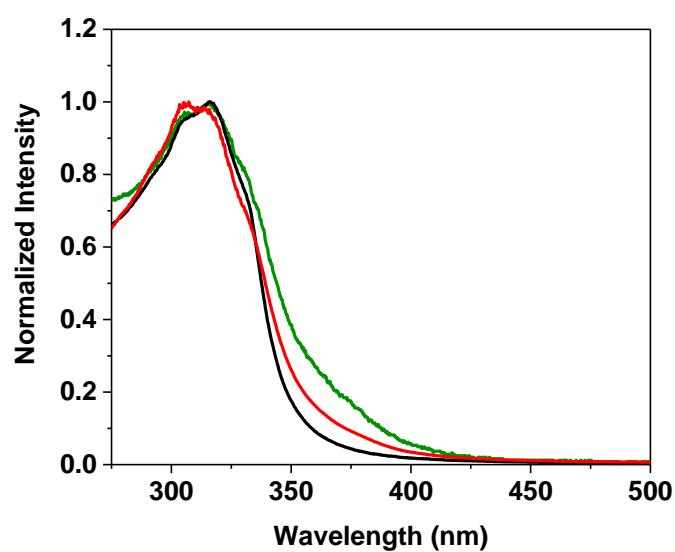

**Fig. S3** Concentration dependence of UV-Vis absorption spectra of **3a** after irradiation with 365 nm light in DMSO (black for 50  $\mu\text{M}$ , red for 500  $\mu\text{M}$  and green for 5,000  $\mu\text{M}$ ).

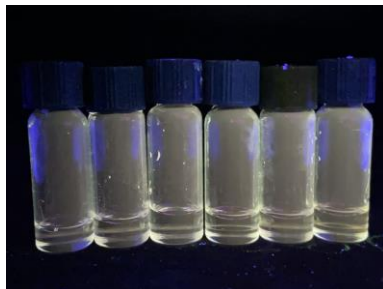

**Fig. S4** Optical images of **3a** before irradiation with 365 nm light taken under UV illumination (Concentrations from left to right: 50, 100, 500, 1000, 5000  $\mu\text{M}$ ).

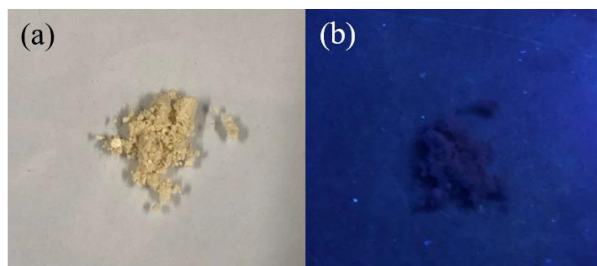

**Fig. S5** Photographs of solid powders of **3a** taken under (a) ambient room lighting and (b) UV illumination.

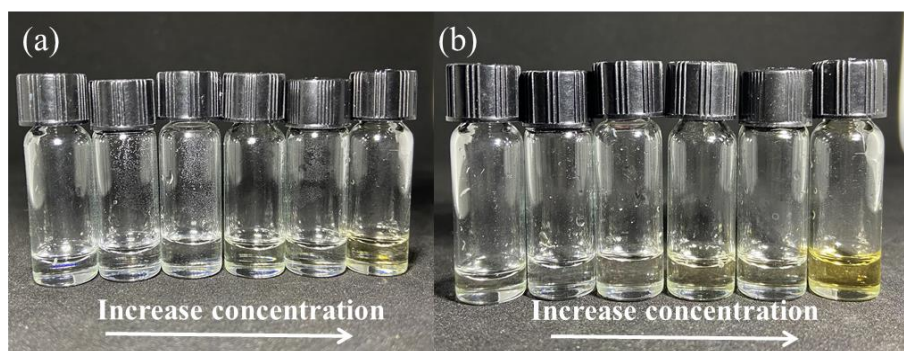

**Fig. S6** Optical images of **3a** (a) before irradiation and (b) after irradiation with 365 nm light taken under ambient room lighting (Concentrations from left to right: 50, 100, 500, 1000, 5000  $\mu\text{M}$ ).

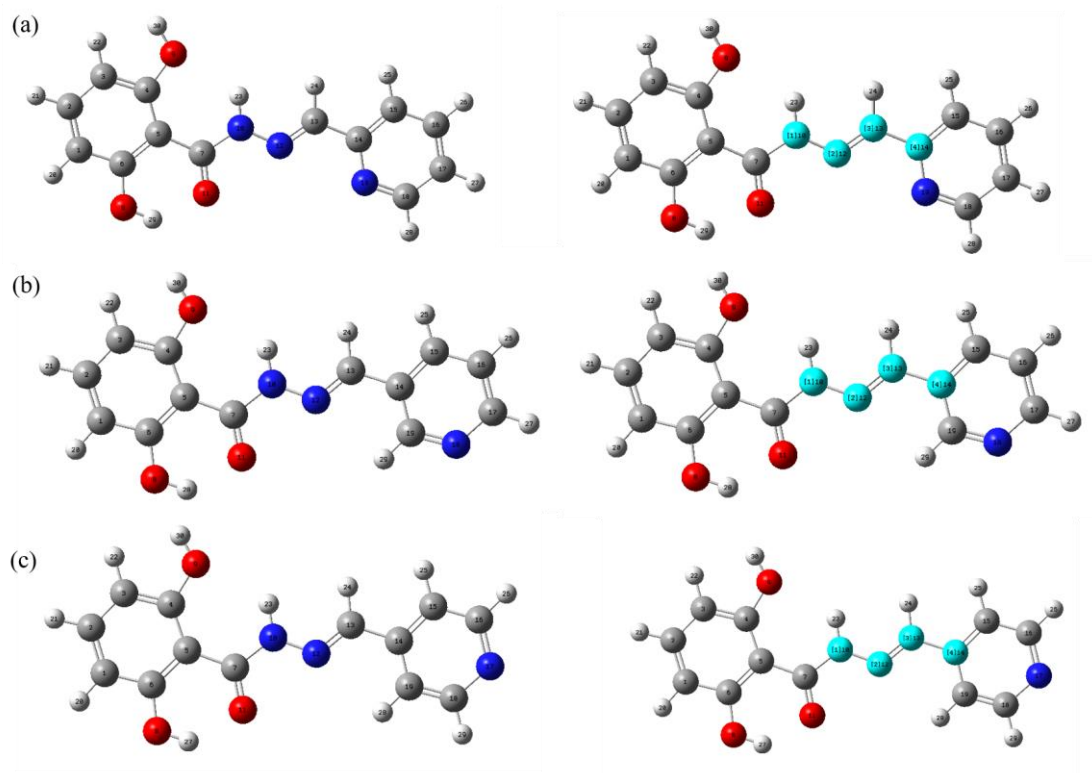

**Fig. S7** The calculated isomerization of (a) **3a**, (b) **3b** and (c) **3c** along a reaction coordinate corresponding to the N<sub>10</sub>–N<sub>12</sub>=C<sub>13</sub>–C<sub>14</sub> dihedral angle.

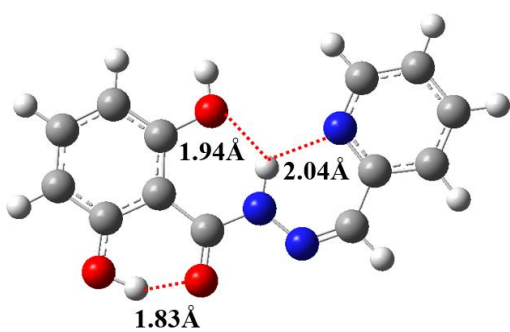

**Fig. S8** The optimized structure of **3a-Z**.

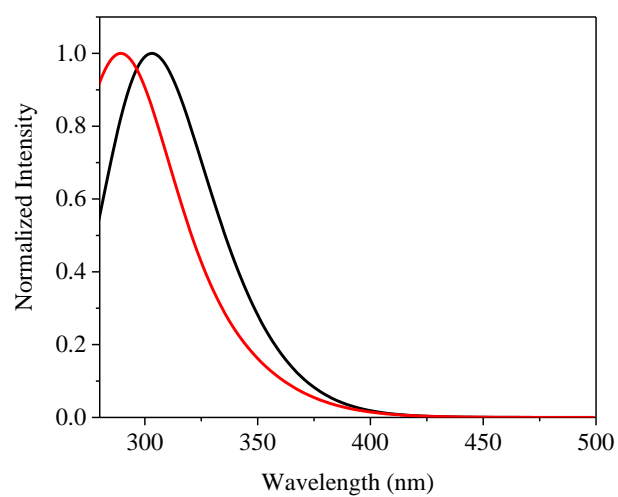

**Fig. S9** The calculated absorption spectra of **3a-E** (black) and **3a-Z** (red).

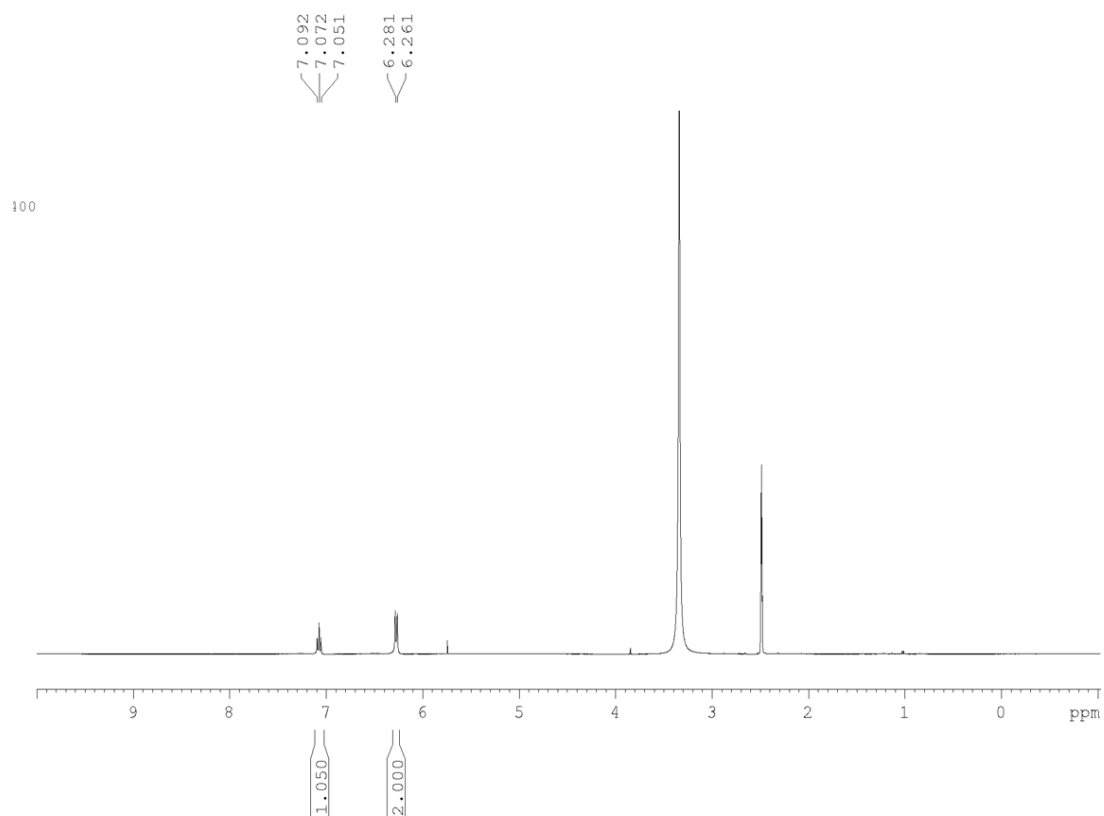

**Fig. S10**  $^1\text{H}$  NMR spectrum for **2** in  $\text{DMSO-}d_6$ .

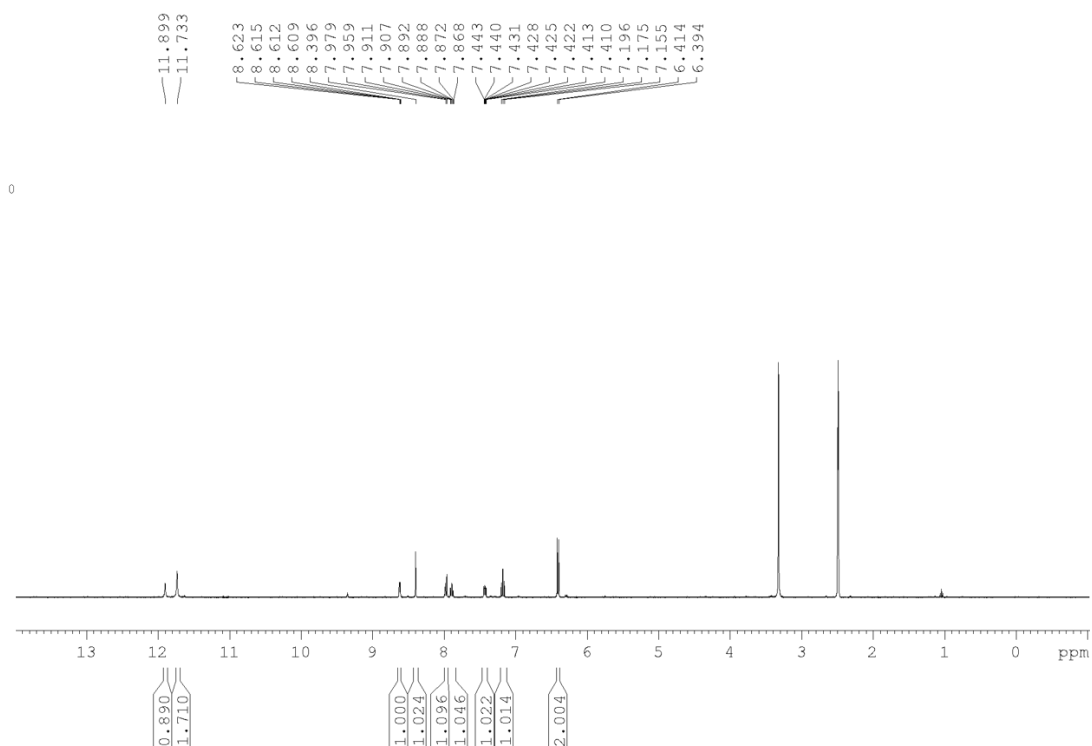

**Fig. S11** <sup>1</sup>H NMR spectrum for **3a** in DMSO-*d*<sub>6</sub>.

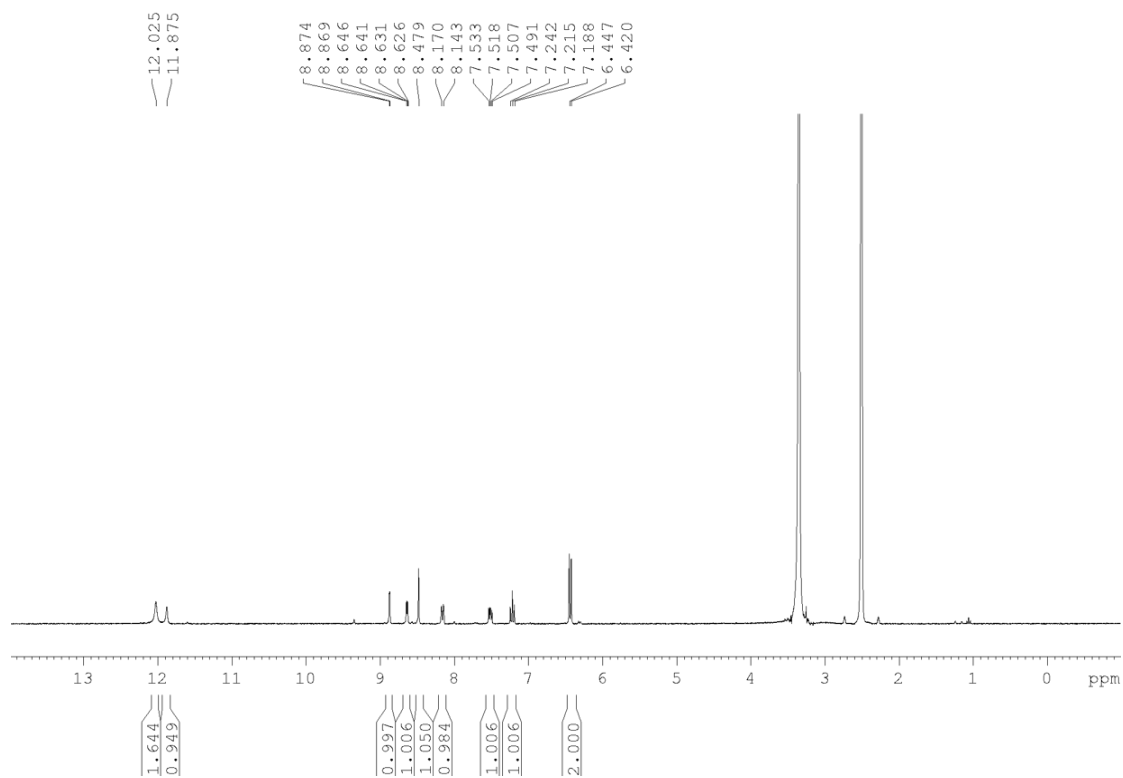

**Fig. S12** <sup>1</sup>H NMR spectrum for **3b** in DMSO-*d*<sub>6</sub>.

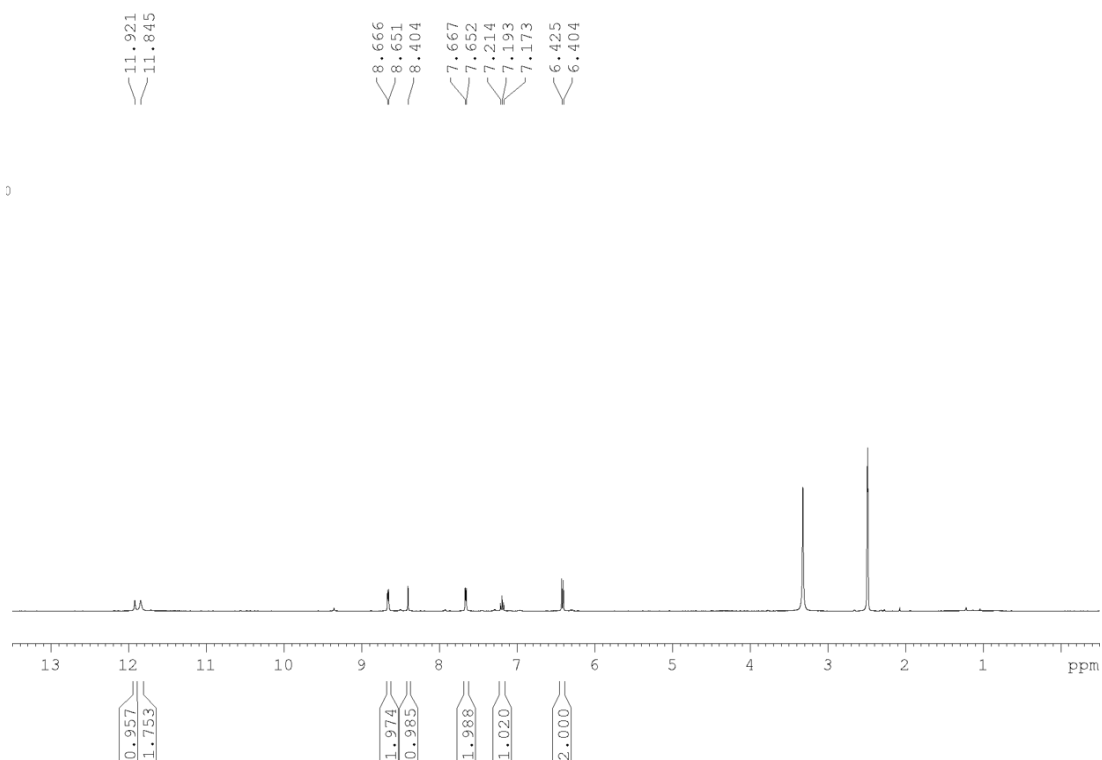

**Fig. S13**  $^1\text{H}$  NMR spectrum for **3c** in  $\text{DMSO-}d_6$ .

Charge number:1 Tolerance:300.00[ppm], 250.00 .. 250.... Unsaturation Number:-200.0 .. 300.0 (...)  
 Element: $^{12}\text{C}$ :13 .. 13,  $^1\text{H}$ :0 .. 12,  $^{14}\text{N}$ :3 .. 3,  $^{23}\text{Na}$ :0 .. 1,  $^{16}\text{O}$ :3 .. 3

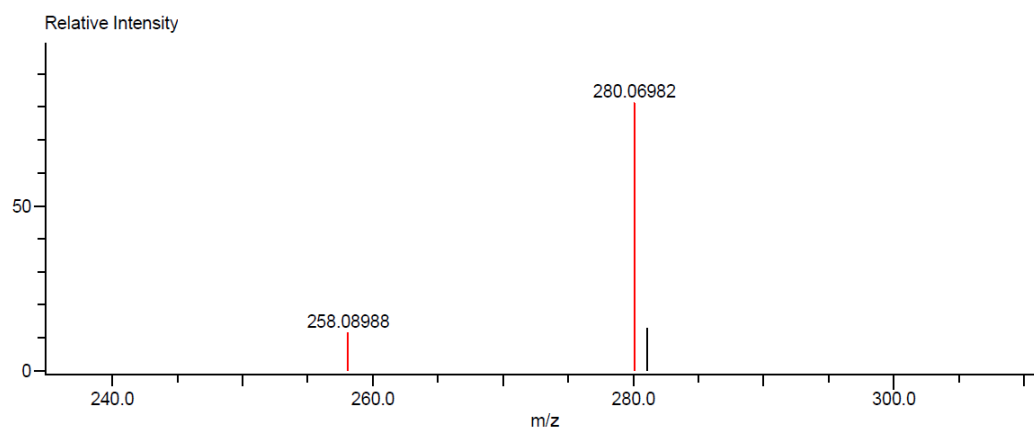

| Mass      | Intensity | Calc. Mass | Mass Difference [mDa] | Mass Difference [ppm] | Possible Formula                                                                  |
|-----------|-----------|------------|-----------------------|-----------------------|-----------------------------------------------------------------------------------|
| 258.08988 | 1032.87   | 258.08787  | 2.01                  | 7.81                  | $^{12}\text{C}_{13}^{1}\text{H}_{12}^{14}\text{N}_3^{16}\text{O}_3$               |
| 280.06982 | 7432.50   | 280.06981  | 0.01                  | 0.03                  | $^{12}\text{C}_{13}^{1}\text{H}_{11}^{14}\text{N}_3^{23}\text{Na}^{16}\text{O}_3$ |

**Fig. S14** HRMS spectrum for **3a**.

Charge number:1 Tolerance:300.00[ppm], 250.00 .. 250.... Unsaturation Number:-200.0 .. 300.0 (...  
 Element:<sup>12</sup>C:13 .. 13, <sup>1</sup>H:0 .. 12, <sup>14</sup>N:3 .. 3, <sup>23</sup>Na:0 .. 1, <sup>16</sup>O:3 .. 3

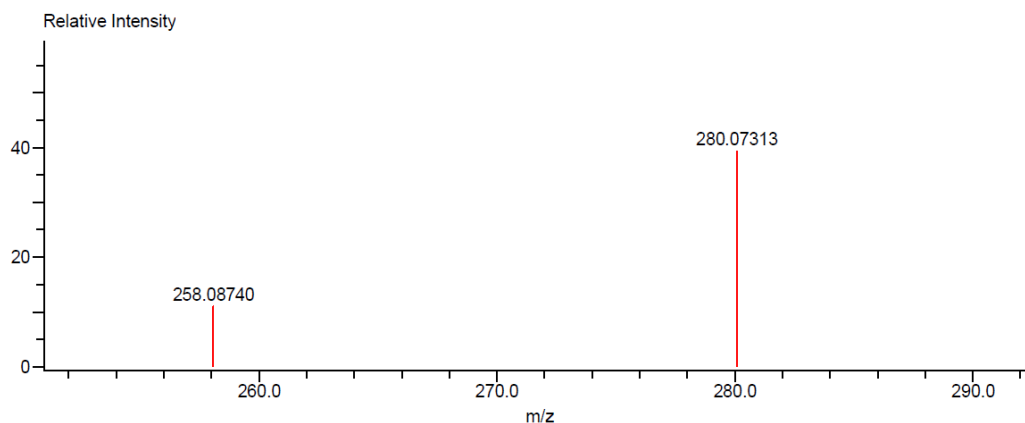

| Mass      | Intensity | Calc. Mass | Mass Difference [mDa] | Mass Difference [ppm] | Possible Formula                                                                                                                      |
|-----------|-----------|------------|-----------------------|-----------------------|---------------------------------------------------------------------------------------------------------------------------------------|
| 258.08740 | 137.51    | 258.08787  | -0.46                 | -1.80                 | <sup>12</sup> C <sub>13</sub> <sup>1</sup> H <sub>12</sub> <sup>14</sup> N <sub>3</sub> <sup>16</sup> O <sub>3</sub>                  |
| 280.07313 | 491.43    | 280.06981  | 3.32                  | 11.85                 | <sup>12</sup> C <sub>13</sub> <sup>1</sup> H <sub>11</sub> <sup>14</sup> N <sub>3</sub> <sup>23</sup> Na <sup>16</sup> O <sub>3</sub> |

**Fig. S15** HRMS spectrum for **3b**.

Charge number:1 Tolerance:300.00[ppm], 250.00 .. 250.... Unsaturation Number:-200.0 .. 300.0 (...  
 Element:<sup>12</sup>C:13 .. 13, <sup>1</sup>H:0 .. 12, <sup>14</sup>N:3 .. 3, <sup>23</sup>Na:0 .. 1, <sup>16</sup>O:3 .. 3

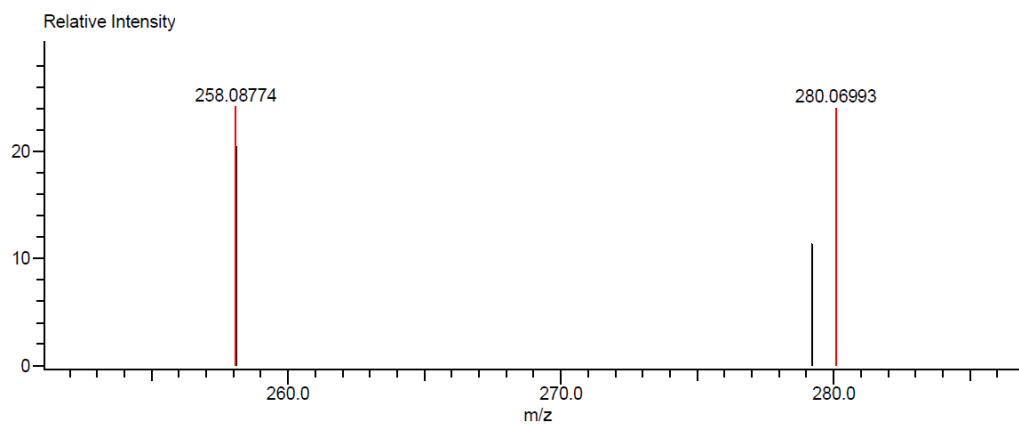

| Mass      | Intensity | Calc. Mass | Mass Difference [mDa] | Mass Difference [ppm] | Possible Formula                                                                                                                      |
|-----------|-----------|------------|-----------------------|-----------------------|---------------------------------------------------------------------------------------------------------------------------------------|
| 258.08774 | 476.08    | 258.08787  | -0.13                 | -0.50                 | <sup>12</sup> C <sub>13</sub> <sup>1</sup> H <sub>12</sub> <sup>14</sup> N <sub>3</sub> <sup>16</sup> O <sub>3</sub>                  |
| 280.06993 | 473.36    | 280.06981  | 0.12                  | 0.44                  | <sup>12</sup> C <sub>13</sub> <sup>1</sup> H <sub>11</sub> <sup>14</sup> N <sub>3</sub> <sup>23</sup> Na <sup>16</sup> O <sub>3</sub> |

**Fig. S16** HRMS spectrum for **3c**.
